# Supplementary material for: Stable nuclear transformation of Eudorina elegans
Source: PubMed Central journal article supplement (PMC3576287; doi:10.1186/1472-6750-13-11), 2013-02-12
Supplement: 1472-6750-13-11-S1.pdf [file 1472-6750-13-11-S1.pdf]

## Summary of the optimal combination of the parameters for *E. elegans* transformation

---

| Parameter                              | Parameter specification                                                      |
|----------------------------------------|------------------------------------------------------------------------------|
| particle bombardment system            | biolistic PDS-1000/He particle delivery system                               |
| target species                         | wild-type <i>Eudorina elegans</i> strain UTEX 1193                           |
| number of target cells                 | approximately $9 \times 10^6$ cells                                          |
| preparation of target cells            | immobilized on cellulose acetate membrane filter;<br>almost free of liquid   |
| material of microprojectiles           | gold                                                                         |
| amount of microprojectiles             | 3 mg for 6 shots                                                             |
| size of microprojectiles               | 0.6 $\mu\text{m}$ in diameter                                                |
| selectable marker                      | pPmr3 (circular)                                                             |
| amount of selectable marker plasmid    | 5 $\mu\text{g}$ for 6 shots                                                  |
| amount of co-transformed plasmid       | 5 $\mu\text{g}$ for 6 shots                                                  |
| coating of microprojectiles            | plasmid-DNA/microcarrier/ $\text{CaCl}_2$ /spermidine/EtOH-<br>precipitation |
| burst pressure of rupture disk         | 1,100 psi                                                                    |
| rupture disk-macrocarrier distance     | 8 mm                                                                         |
| macrocarrier-stopping screen distance  | 7 mm                                                                         |
| stopping screen-target cell distance   | 8 cm                                                                         |
| chamber evacuation                     | 27 inch Hg                                                                   |
| cultivation after particle bombardment | in liquid medium                                                             |

---
