# Supplementary material for: Stable nuclear transformation of Eudorina elegans
Source: PubMed Central journal article supplement (PMC3576287; doi:10.1186/1472-6750-13-11), 2013-02-12
Supplement: 1472-6750-13-11-S2.pdf [file 1472-6750-13-11-S2.pdf]

## Paromomycin resistance in transformants\*

| transformant | resistance<br>up to ... µg<br>paromomycin/ml** | transformant | resistance<br>up to ... µg<br>paromomycin/ml** | transformant | resistance<br>up to ... µg<br>paromomycin/ml** |
|--------------|------------------------------------------------|--------------|------------------------------------------------|--------------|------------------------------------------------|
| EuTJ-4       | 20                                             | EuHR-1       | 20                                             | EuHsp-1      | 10                                             |
| EuTJ-5       | 5                                              | EuHR-2       | 20                                             | EuHsp-2      | 20                                             |
| EuTJ-6       | 10                                             | EuHR-3       | 20                                             | EuHsp-3      | 50                                             |
| EuTJ-11      | 20                                             | EuHR-4       | 20                                             | EuHsp-4      | 20                                             |
| EuTJ-14      | 10                                             | EuHR-5       | 20                                             | EuHsp-5      | 20                                             |
| EuTJ-20      | 5                                              | EuHR-6       | 20                                             | EuHsp-6      | 20                                             |
| EuTJ-23      | 30                                             | EuHR-7       | 30                                             | EuHsp-7      | 10                                             |
| EuTJ-24      | 20                                             | EuHR-8       | 20                                             | EuHsp-8      | 10                                             |
| EuTJ-25      | 30                                             | EuHR-9       | 20                                             | EuHsp-9      | 20                                             |
| EuTJ-30      | 20                                             | EuHR-10      | 20                                             | EuHsp-10     | 10                                             |
|              |                                                | EuHR-11      | 20                                             | EuHsp-11     | 20                                             |
|              |                                                | EuHR-12      | 20                                             |              |                                                |

\* the maximal tolerance of the wild-type strain *E. elegans* UTEX 1193 was 0.15 µg paromomycin/ml

\*\* the tested concentrations were 0.00, 0.05, 0.10, 0.15, 0.20, 0.25, 0.30, 0.35, 0.40, 0.45, 0.50, 0.75, 1.00, 1.25, 1.50, 1.75, 2, 5, 10, 20, 30, 40, 50, and 100 µg paromomycin/ml
