# Supplementary material for: Stable nuclear transformation of Eudorina elegans
Source: PubMed Central journal article supplement (PMC3576287; doi:10.1186/1472-6750-13-11), 2013-02-12
Supplement: 1472-6750-13-11-S3.pdf [file 1472-6750-13-11-S3.pdf]

## Luciferase activity of transformants at increased temperatures\*

| Temperature | Wild-type     | EuTJ-6        | EuHsp-2          | EuHsp-6       | EuHsp-11       | EuHR-1         | EuHR-8         | EuHR-11        |
|-------------|---------------|---------------|------------------|---------------|----------------|----------------|----------------|----------------|
| 27°C        | 1.00 (± 0.00) | 1.00 (± 0.00) | 1.00 (± 0.01)    | 1.00 (± 0.00) | 1.00 (± 0.00)  | 1.00 (± 0.01)  | 1.00 (± 0.01)  | 1.00 (± 0.00)  |
| 30°C        | 1.02 (± 0.00) | 1.05 (± 0.00) | 1.17 (± 0.04)    | 1.02 (± 0.01) | 1.07 (± 0.03)  | 1.06 (± 0.02)  | 1.12 (± 0.04)  | 1.10 (± 0.03)  |
| 33°C        | 1.07 (± 0.05) | 1.14 (± 0.04) | 5.02 (± 0.35)    | 1.16 (± 0.02) | 1.59 (± 0.02)  | 1.15 (± 0.05)  | 1.29 (± 0.03)  | 1.12 (± 0.02)  |
| 36°C        | 1.02 (± 0.03) | 1.30 (± 0.02) | 18.23 (± 0.31)   | 1.42 (± 0.02) | 1.94 (± 0.08)  | 1.88 (± 0.06)  | 2.55 (± 0.14)  | 1.96 (± 0.42)  |
| 39°C        | 0.99 (± 0.07) | 1.23 (± 0.16) | 55.95 (± 1.09)   | 1.79 (± 0.05) | 5.82 (± 1.63)  | 3.21 (± 0.38)  | 6.94 (± 1.32)  | 4.34 (± 0.15)  |
| 42°C        | 1.11 (± 0.01) | 1.86 (± 0.16) | 581.50 (± 20.38) | 7.70 (± 0.29) | 57.13 (± 6.48) | 11.71 (± 1.95) | 22.17 (± 0.91) | 11.77 (± 2.74) |
| 45°C        | 1.06 (± 0.04) | 0.93 (± 0.07) | 1.25 (± 0.09)    | 0.95 (± 0.01) | 3.66 (± 1.15)  | 0.55 (± 0.08)  | 0.69 (± 0.14)  | 0.76 (± 0.03)  |
| 48°C        | 0.83 (± 0.04) | 0.02 (± 0.00) | 0.25 (± 0.02)    | 0.02 (± 0.01) | 0.07 (± 0.02)  | 0.01 (± 0.00)  | 0.02 (± 0.00)  | 0.19 (± 0.01)  |
| 51°C        | 0.69 (± 0.02) | 0.02 (± 0.00) | 0.09 (± 0.06)    | 0.02 (± 0.00) | 0.05 (± 0.00)  | 0.01 (± 0.00)  | 0.01 (± 0.00)  | 0.13 (± 0.02)  |
| 54°C        | 0.60 (± 0.04) | 0.02 (± 0.01) | 0.00 (± 0.02)    | 0.01 (± 0.00) | 0.04 (± 0.01)  | 0.01 (± 0.00)  | 0.00 (± 0.00)  | 0.00 (± 0.00)  |
| 57°C        | 0.61 (± 0.01) | 0.02 (± 0.00) | 0.00 (± 0.02)    | 0.01 (± 0.00) | 0.03 (± 0.00)  | 0.01 (± 0.00)  | 0.00 (± 0.01)  | 0.00 (± 0.00)  |

\* Cells were incubated for 1 h at the given temperature. After a recovery phase at 27°C for 15 min, cells were lysed, and luciferase activity was measured. Fold induction of luciferase activity in heat-shocked cells was calculated in relation to the non-heat-shocked cells at 27°C.
